# Supplementary material
Source: Springer Nature journal article supplement (https://www.springermedizin.de/resource/supplementary/12885_2008_1200_MOESM3_ESM.pdf/9471410)

***P=0.101***

**ATBF1/G\*1000**

2000  
1500  
1000  
500  
0

**ROH**

**LOH**

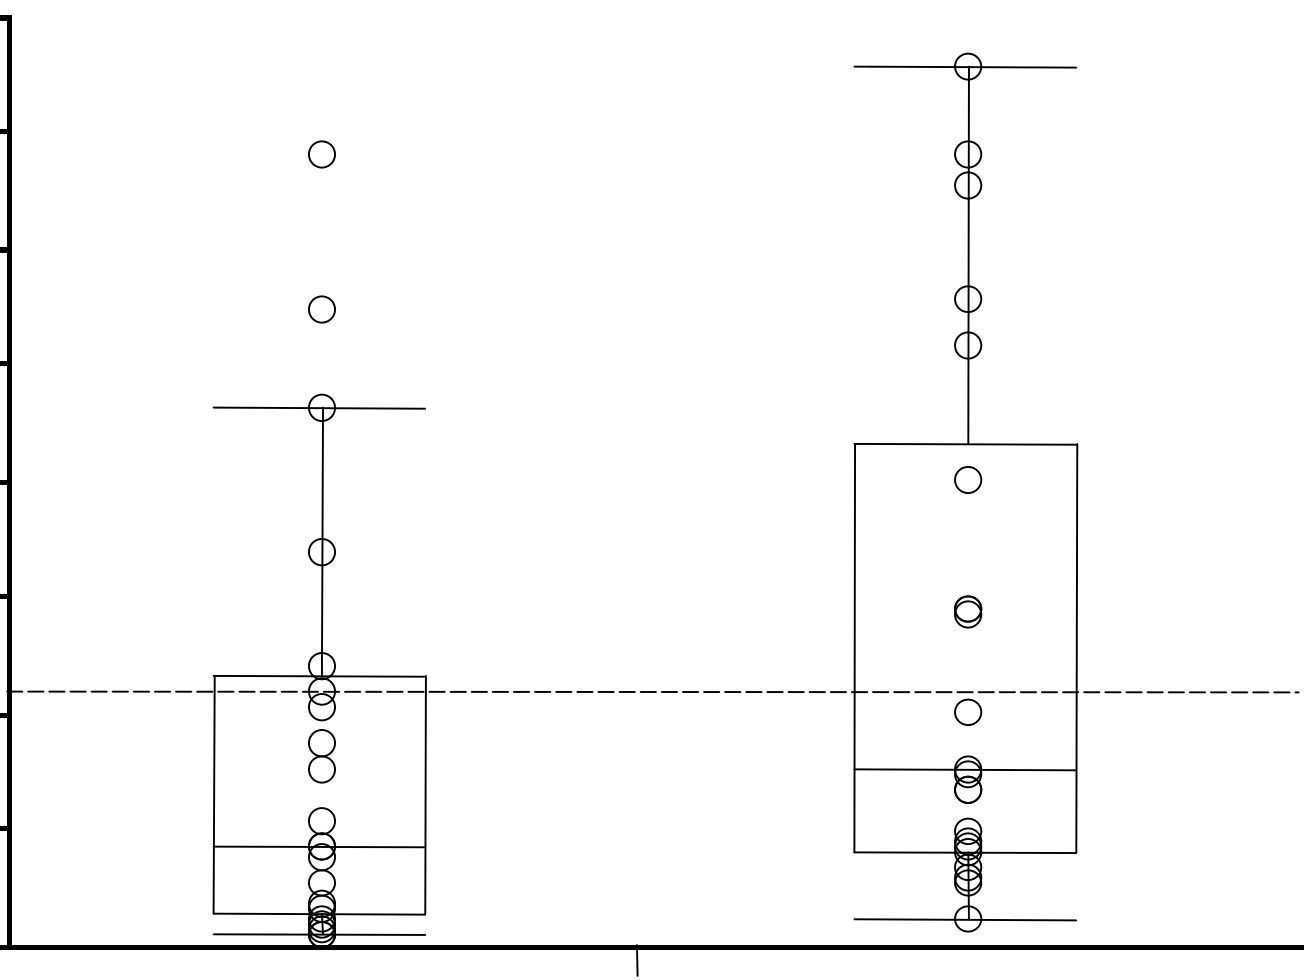

Supplement: MOESM3 [file 9471410]
